# Supplementary material for: Discovering a green pesticide candidate for controlling bacterial plant disease: 1,2,3,4-tetrahydro-β-carboline as a potential biofilm inhibitor
Source: Royal Society of Chemistry journal article supplement (doi:10.1039/d5ra07526b), 2025-01-01

# Discovering a Green Pesticide Candidate for Controlling Bacterial Plant Disease: 1,2,3,4-Tetrahydro- $\beta$ -carboline as a Potential Biofilm Inhibitor

Puying Qi <sup>1,4\*</sup>, Hongwu Liu <sup>2</sup>, Yue Li <sup>1</sup>, Daiyu Tang <sup>3</sup>, Lei Shao <sup>1</sup>, Junjie Wang <sup>1,4</sup>, Qifei Zhu <sup>1</sup>, Taibai Jiang <sup>1</sup>, Lixia Li <sup>1</sup>, Shilong Jiang <sup>1</sup>, Fan Wu <sup>1</sup>, Yanhong Guo <sup>1</sup>, Yong Liu<sup>1</sup>, Lihong Shi <sup>1,\*</sup>, Yin Wang <sup>1,\*</sup> and Jun Sun <sup>5,\*</sup>.

<sup>1</sup> Guizhou Province Engineering Research Center of Medical Resourceful Healthcare Products, College of Pharmacy, Guiyang Healthcare Vocational University, Guiyang, 550081, China.

<sup>2</sup> National Key Laboratory of Green Pesticide, Key Laboratory of Green Pesticide and Agricultural Bioengineering, Ministry of Education, Center for R&D of Fine Chemicals of Guizhou University, Guiyang, 550025, China.

<sup>3</sup> Guizhou Provincial Center for Disease Control and Prevention, Guiyang, 550004, China.

<sup>4</sup> Guizhou Provincial Doctor Innovation Station, Southeastern Guizhou Province, 556400, China.

<sup>5</sup> College of Chemistry and Chemical Engineering, Guizhou University of Engineering Science, Xueyuan Road, Qixingguan District, Bijie 551700, China. and Analytical and Testing Center, Guizhou University of Engineering Science, Xueyuan Road, Qixingguan District, Bijie 551700, China

\* Correspondence: [qpuying000@163.com](mailto:qpuying000@163.com) or [qipuying@gyhvu.edu.cn](mailto:qipuying@gyhvu.edu.cn) (P.Q.); [shilihong@zju.edu.cn](mailto:shilihong@zju.edu.cn) (L.S.); [ada\\_wy@126.com](mailto:ada_wy@126.com) (Y.W.); [sun-jun@gues.edu.cn](mailto:sun-jun@gues.edu.cn) (J.S.)

## Table S1. ADMETlab assessment.

### 1. Physicochemical Property

| Property         | Value   | Comment                                         |
|------------------|---------|-------------------------------------------------|
| Molecular Weight | 174.12  | Contain hydrogen atoms. Optimal:100~600         |
| Volume           | 187.227 | Van der Waals volume                            |
| Density          | 0.93    | Density = MW / Volume                           |
| nHA              | 2       | Number of hydrogen bond acceptors. Optimal:0~12 |
| nHD              | 2       | Number of hydrogen bond donors. Optimal:0~7     |
| nRot             | 0       | Number of rotatable bonds. Optimal:0~11         |

|                |        |                                                              |
|----------------|--------|--------------------------------------------------------------|
| nRing          | 3      | Number of rings. Optimal:0~6                                 |
| MaxRing        | 13     | Number of atoms in the biggest ring. Optimal:0~18            |
| nHet           | 2      | Number of heteroatoms. Optimal:1~15                          |
| fChar          | 0      | Formal charge. Optimal:-4 ~4                                 |
| nRig           | 15     | Number of rigid bonds. Optimal:0~30                          |
| Flexibility    | 0.0    | Flexibility = nRot /nRig                                     |
| Stereo Centers | 2      | Optimal: $\square$ 2                                         |
| TPSA           | 24.06  | Topological Polar Surface Area. Optimal:0~140                |
| logS           | -1.673 | Log of the aqueous solubility. Optimal: -4~0.5 log mol/L     |
| logP           | 1.226  | Log of the octanol/water partition coefficient. Optimal: 0~3 |
| logD           | 1.414  | logP at physiological pH 7.4. Optimal: 1~3                   |

## 2. Medicinal Chemistry

| Property        | Value    | Decision | Comment                                                                                                                                                                                                                                     |
|-----------------|----------|----------|---------------------------------------------------------------------------------------------------------------------------------------------------------------------------------------------------------------------------------------------|
| QED             | 0.623    | ●        | <p>■ A measure of drug-likeness based on the concept of desirability;</p> <p>■ Attractive: &gt; 0.67; unattractive: 0.49~0.67; too complex: &lt; 0.34</p>                                                                                   |
| SAscore         | 3.196    | ●        | <p>■ Synthetic accessibility score is designed to estimate ease of synthesis of drug-like molecules.</p> <p>■ SAscore <math>\square</math> 6, difficult to synthesize; SAscore &lt;6, easy to synthesize</p>                                |
| Fsp3            | 0.455    | ●        | <p>■ The number of sp<sup>3</sup> hybridized carbons / total carbon count, correlating with melting point and solubility.</p> <p>■ Fsp<sup>3</sup> <math>\square</math> 0.42 is considered a suitable value.</p>                            |
| MCE-18          | 47.125   | ●        | <p>■ MCE-18 stands for medicinal chemistry evolution.</p> <p>■ MCE-18 <math>\square</math> 45 is considered a suitable value.</p>                                                                                                           |
| NPscore         | 0.653    | -        | <p>■ Natural product-likeness score.</p> <p>■ This score is typically in the range from <math>\square</math> 5 to 5. The higher the score is, the higher the probability is that the molecule is a NP.</p>                                  |
| Lipinski Rule   | Accepted | ●        | <p>■ MW <math>\square</math> 500; logP <math>\square</math> 5; Hacc <math>\square</math> 10; Hdon <math>\square</math> 5</p> <p>■ If two properties are out of range, a poor absorption or permeability is possible, one is acceptable.</p> |
| Pfizer Rule     | Accepted | ●        | <p>logP &gt; 3; TPSA &lt; 75</p> <p>Compounds with a high log P (&gt;3) and low TPSA (&lt;75) are likely to be toxic.</p>                                                                                                                   |
| GSK Rule        | Accepted | ●        | <p>■ MW <math>\square</math> 400; logP <math>\square</math> 4</p> <p>■ Compounds satisfying the GSK rule may have a more favorable ADMET profile</p>                                                                                        |
| Golden Triangle | Rejected | ●        | <p>■ 200 <math>\square</math> MW <math>\square</math> 50; -2 <math>\square</math> logD <math>\square</math> 5</p> <p>■ Compounds satisfying the Golden Triangle rule may have a more favorable ADMET profile.</p>                           |

|                  |          |   |                                                                                                   |
|------------------|----------|---|---------------------------------------------------------------------------------------------------|
| PAINS            | 0 alerts | - | Pan Assay Interference Compounds, frequent hitters, Alpha-screen artifacts and reactive compound. |
| ALAR<br>M NMR    | 0 alerts | - | Thiol reactive compounds.                                                                         |
| BMS              | 0 alerts | - | Undesirable, reactive compounds.                                                                  |
| Chelator<br>Rule | 0 alerts | - | Chelating compounds.                                                                              |

### 3. Absorption

| Property               | Value  | Decision | Comment                                                                                                                                                                                                                                                   |
|------------------------|--------|----------|-----------------------------------------------------------------------------------------------------------------------------------------------------------------------------------------------------------------------------------------------------------|
| Caco-2<br>Permeability | -4.987 | ●        | Optimal: higher than -5.15 Log unit                                                                                                                                                                                                                       |
| MDCK<br>Permeability   | 6e-06  | ●        | ■ low permeability: $< 2 \times 10^{-6}$ cm/s<br>■ medium permeability: $2-20 \times 10^{-6}$ cm/s<br>■ high passive permeability: $> 20 \times 10^{-6}$ cm/s                                                                                             |
| Pgp-inhibitor          | 0.0    | ●        | ■ Category 1: Inhibitor; Category 0: Non-inhibitor;<br>■ The output value is the probability of being Pgp-inhibitor                                                                                                                                       |
| Pgp-substrate          | 0.293  | ●        | ■ Category 1: substrate; Category 0: Non-substrate;<br>■ The output value is the probability of being Pgp-substrate                                                                                                                                       |
| HIA                    | 0.012  | ●        | ■ Human Intestinal Absorption<br>■ Category 1: HIA+ (HIA $< 30\%$ ); Category 0: HIA- (HIA $< 30\%$ ); The output value is the probability of being HIA+                                                                                                  |
| F <sub>20%</sub>       | 0.027  | ●        | ■ 20% Bioavailability<br>■ Category 1: F <sub>20%</sub> <sup>+</sup> (bioavailability $< 20\%$ ); Category 0: F <sub>20%</sub> <sup>-</sup> (bioavailability $\square 20\%$ ); The output value is the probability of being F <sub>20%</sub> <sup>+</sup> |
| F <sub>30%</sub>       | 0.024  | ●        | ■ 30% Bioavailability<br>■ Category 1: F <sub>30%</sub> <sup>+</sup> (bioavailability $< 30\%$ ); Category 0: F <sub>30%</sub> <sup>-</sup> (bioavailability $\square 30\%$ ); The output value is the probability of being F <sub>30%</sub> <sup>+</sup> |

### 4. Distribution

| Property           | Value  | Decision | Comment                                                                                                                      |
|--------------------|--------|----------|------------------------------------------------------------------------------------------------------------------------------|
| PPB                | 21.79% | ●        | ■ Plasma Protein Binding<br>■ Optimal: $< 90\%$ . Drugs with high protein-bound may have a low therapeutic index.            |
| VD                 | 3.381  | ●        | ■ Volume Distribution<br>■ Optimal: 0.04-20L/kg                                                                              |
| BBB<br>Penetration | 0.868  | ●        | ■ Blood-Brain Barrier Penetration<br>■ Category 1: BBB+; Category 0: BBB-; The output value is the probability of being BBB+ |
| Fu                 | 66.67% | ●        | ■ The fraction unbound in plasms<br>■ Low: $< 5\%$ ; Middle: 5~20%; High: $> 20\%$                                           |

## 5. Metabolism

| Property          | Value | Comment                                                                                                                     |
|-------------------|-------|-----------------------------------------------------------------------------------------------------------------------------|
| CYP1A2 inhibitor  | 0.103 | <p>■ Category 1: Inhibitor; Category 0: Non-inhibitor;</p> <p>■ The output value is the probability of being inhibitor.</p> |
| CYP1A2 substrate  | 0.219 | <p>■ Category 1: Substrate; Category 0: Non-substrate;</p> <p>■ The output value is the probability of being substrate.</p> |
| CYP2C19 inhibitor | 0.065 | <p>■ Category 1: Inhibitor; Category 0: Non-inhibitor;</p> <p>■ The output value is the probability of being inhibitor.</p> |
| CYP2C19 substrate | 0.884 | <p>■ Category 1: Substrate; Category 0: Non-substrate;</p> <p>■ The output value is the probability of being substrate.</p> |
| CYP2C9 inhibitor  | 0.011 | <p>■ Category 1: Inhibitor; Category 0: Non-inhibitor;</p> <p>■ The output value is the probability of being inhibitor.</p> |
| CYP2C9 substrate  | 0.192 | <p>■ Category 1: Substrate; Category 0: Non-substrate;</p> <p>■ The output value is the probability of being substrate.</p> |
| CYP2D6 inhibitor  | 0.422 | <p>■ Category 1: Inhibitor; Category 0: Non-inhibitor;</p> <p>■ The output value is the probability of being inhibitor.</p> |
| CYP2D6 substrate  | 0.871 | <p>■ Category 1: Substrate; Category 0: Non-substrate;</p> <p>■ The output value is the probability of being substrate.</p> |
| CYP3A4 inhibitor  | 0.068 | <p>■ Category 1: Inhibitor; Category 0: Non-inhibitor;</p> <p>■ The output value is the probability of being inhibitor.</p> |
| CYP3A4 substrate  | 0.367 | <p>■ Category 1: Substrate; Category 0: Non-substrate;</p> <p>■ The output value is the probability of being substrate.</p> |

## 6. Excretion

| Property         | Value | Decision | Comment                                                                                                                                                                                                                                           |
|------------------|-------|----------|---------------------------------------------------------------------------------------------------------------------------------------------------------------------------------------------------------------------------------------------------|
| CL               | 9.98  | ●        | <ul style="list-style-type: none"> <li>■ Clearance</li> <li>■ High: &gt;15 mL/min/kg; moderate: 5-15 mL/min/kg; low: &lt;5 mL/min/kg</li> </ul>                                                                                                   |
| T <sub>1/2</sub> | 0.386 | -        | <ul style="list-style-type: none"> <li>■ Category 1: long half-life ; Category 0: short half-life;</li> <li>■ long half-life: &gt;3h; short half-life: &lt;3h</li> <li>■ The output value is the probability of having long half-life.</li> </ul> |

## 7. Toxicity

| Property                | Value | Decision | Comment                                                                                                                                                                                                                           |
|-------------------------|-------|----------|-----------------------------------------------------------------------------------------------------------------------------------------------------------------------------------------------------------------------------------|
| hERG Blockers           | 0.177 | ●        | <ul style="list-style-type: none"> <li>■ Category 1: active; Category 0: inactive;</li> <li>■ The output value is the probability of being active.</li> </ul>                                                                     |
| H-HT                    | 0.652 | ●        | <ul style="list-style-type: none"> <li>■ Human Hepatotoxicity</li> <li>■ Category 1: H-HT positive(+); Category 0: H-HT negative(-);</li> <li>■ The output value is the probability of being toxic.</li> </ul>                    |
| DILI                    | 0.044 | ●        | <ul style="list-style-type: none"> <li>■ Drug Induced Liver Injury.</li> <li>■ Category 1: drugs with a high risk of DILI; Category 0: drugs with no risk of DILI. The output value is the probability of being toxic.</li> </ul> |
| AMES Toxicity           | 0.918 | ●        | <ul style="list-style-type: none"> <li>■ Category 1: Ames positive(+); Category 0: Ames negative(-);</li> <li>■ The output value is the probability of being toxic.</li> </ul>                                                    |
| Rat Oral Acute Toxicity | 0.825 | ●        | <ul style="list-style-type: none"> <li>■ Category 0: low-toxicity; Category 1: high-toxicity;</li> <li>■ The output value is the probability of being highly toxic.</li> </ul>                                                    |
| FEAMDD                  | 0.654 | ●        | <ul style="list-style-type: none"> <li>■ Maximum Recommended Daily Dose</li> <li>■ Category 1: FEAMDD (+); Category 0: FEAMDD (-)</li> <li>■ The output value is the probability of being positive.</li> </ul>                    |
| Skin Sensitization      | 0.618 | ●        | <ul style="list-style-type: none"> <li>■ Category 1: Sensitizer; Category 0: Non-sensitizer;</li> <li>■ The output value is the probability of being sensitizer.</li> </ul>                                                       |
| Carcinogenicity         | 0.09  | ●        | <ul style="list-style-type: none"> <li>■ Category 1: carcinogens; Category 0: non-carcinogens;</li> <li>■ The output value is the probability of being toxic.</li> </ul>                                                          |
| Eye Corrosion           | 0.005 | ●        | <ul style="list-style-type: none"> <li>■ Category 1: corrosives ; Category 0: noncorrosives</li> <li>■ The output value is the probability of being corrosives.</li> </ul>                                                        |
| Eye Irritation          | 0.037 | ●        | <ul style="list-style-type: none"> <li>■ Category 1: irritants ; Category 0: nonirritants</li> <li>■ The output value is the probability of being irritants.</li> </ul>                                                           |
| Respiratory Toxicity    | 0.975 | ●        | <ul style="list-style-type: none"> <li>■ Category 1: respiratory toxicants; Category 0: respiratory nontoxicants</li> <li>■ The output value is the probability of being toxic.</li> </ul>                                        |

## 8. Environmental toxicity

| Property                       | Value | Comment                                                                                                                                                                                                                                    |
|--------------------------------|-------|--------------------------------------------------------------------------------------------------------------------------------------------------------------------------------------------------------------------------------------------|
| Bioconcentration Factors       | 0.511 | <p>■ Bioconcentration factors are used for considering secondary poisoning potential and assessing risks to human health via the food chain.</p> <p>■ The unit is <math>\square \log_{10}[(\text{mg/L})/(1000 \cdot \text{MW})]</math></p> |
| IGC <sub>50</sub>              | 2.987 | <p>■ Tetrahymena pyriformis 50 percent growth inhibition concentration</p> <p>■ The unit is <math>\square \log_{10}[(\text{mg/L})/(1000 \cdot \text{MW})]</math></p>                                                                       |
| LC <sub>50</sub> <sup>FM</sup> | 3.056 | <p>■ 96-hour fathead minnow 50 percent lethal concentration</p> <p>■ The unit is <math>\square \log_{10}[(\text{mg/L})/(1000 \cdot \text{MW})]</math></p>                                                                                  |
| LC <sub>50</sub> <sup>DM</sup> | 4.875 | <p>■ 48-hour daphnia magna 50 percent lethal concentration</p> <p>■ The unit is <math>\square \log_{10}[(\text{mg/L})/(1000 \cdot \text{MW})]</math></p>                                                                                   |

## 9. Tox21 pathway

| Property      | Value | Decision | Comment                                                                                                                                                                       |
|---------------|-------|----------|-------------------------------------------------------------------------------------------------------------------------------------------------------------------------------|
| NR-AR         | 0.004 | ●        | <p>■ Androgen receptor</p> <p>■ Category 1: actives ; Category 0: inactives;</p> <p>■ The output value is the probability of being active.</p>                                |
| NR-AR-LBD     | 0.002 | ●        | <p>■ Androgen receptor ligand-binding domain</p> <p>■ Category 1: actives ; Category 0: inactives;</p> <p>■ The output value is the probability of being active.</p>          |
| NR-AhR        | 0.224 | ●        | <p>■ Aryl hydrocarbon receptor</p> <p>■ Category 1: actives ; Category 0: inactives;</p> <p>■ The output value is the probability of being active.</p>                        |
| NR-Aromatase  | 0.004 | ●        | <p>■ Category 1: actives ; Category 0: inactives;</p> <p>■ The output value is the probability of being active.</p>                                                           |
| NR-ER         | 0.081 | ●        | <p>■ Estrogen receptor</p> <p>■ Category 1: actives ; Category 0: inactives;</p> <p>■ The output value is the probability of being active.</p>                                |
| NR-ER-LBD     | 0.007 | ●        | <p>■ Estrogen receptor ligand-binding domain</p> <p>■ Category 1: actives ; Category 0: inactives;</p> <p>■ The output value is the probability of being active.</p>          |
| NR-PPAR-gamma | 0.002 | ●        | <p>■ Peroxisome proliferator-activated receptor gamma</p> <p>■ Category 1: actives ; Category 0: inactives;</p> <p>■ The output value is the probability of being active.</p> |
| SR-ARE        | 0.067 | ●        | <p>■ Antioxidant response element</p> <p>■ Category 1: actives ; Category 0: inactives;</p> <p>■ The output value is the probability of being active.</p>                     |
| SR-ATAD5      | 0.017 | ●        | <p>■ ATPase family AAA domain-containing protein 5</p> <p>■ Category 1: actives ; Category 0: inactives;</p> <p>■ The output value is the probability of being active.</p>    |
| SR-HSE        | 0.241 | ●        | <p>■ Heat shock factor response element</p> <p>■ Category 1: actives ; Category 0: inactives;</p> <p>■ The output value is the probability of being active.</p>               |
| SR-MMP        | 0.02  | ●        | <p>■ Mitochondrial membrane potential</p> <p>■ Category 1: actives ; Category 0: inactives;</p> <p>■ The output value is the probability of being active.</p>                 |

|        |       |   |                                                                                                                                                                  |
|--------|-------|---|------------------------------------------------------------------------------------------------------------------------------------------------------------------|
| SR-p53 | 0.012 | ● | <ul style="list-style-type: none"> <li>■ Category 1: actives ; Category 0: inactives;</li> <li>■ The output value is the probability of being active.</li> </ul> |
|--------|-------|---|------------------------------------------------------------------------------------------------------------------------------------------------------------------|

## 10. Toxicophore Rules

| Property                          | Value    | Comment                                                                                                                         |
|-----------------------------------|----------|---------------------------------------------------------------------------------------------------------------------------------|
| Acute Toxicity Rule               | 0 alerts | <ul style="list-style-type: none"> <li>■ 20 substructures</li> <li>■ acute toxicity during oral administration</li> </ul>       |
| Genotoxic Carcinogenicity Rule    | 1 alerts | <ul style="list-style-type: none"> <li>■ 117 substructures</li> <li>■ carcinogenicity or mutagenicity</li> </ul>                |
| NonGenotoxic Carcinogenicity Rule | 0 alerts | <ul style="list-style-type: none"> <li>■ 23 substructures</li> <li>■ carcinogenicity through nongenotoxic mechanisms</li> </ul> |
| Skin Sensitization Rule           | 3 alerts | <ul style="list-style-type: none"> <li>■ 155 substructures</li> <li>■ skin irritation</li> </ul>                                |
| Aquatic Toxicity Rule             | 1 alerts | <ul style="list-style-type: none"> <li>■ 99 substructures</li> <li>■ toxicity to liquid(water)</li> </ul>                       |
| NonBiodegradable Rule             | 0 alerts | <ul style="list-style-type: none"> <li>■ 19 substructures</li> <li>■ non-biodegradable</li> </ul>                               |
| SureChEMBL Rule                   | 0 alerts | <ul style="list-style-type: none"> <li>■ 164 substructures</li> <li>■ MedChem unfriendly status</li> </ul>                      |

**Figure S1. The antibacterial activity of four THC analogues and thiodiazole-copper against Xoo.**

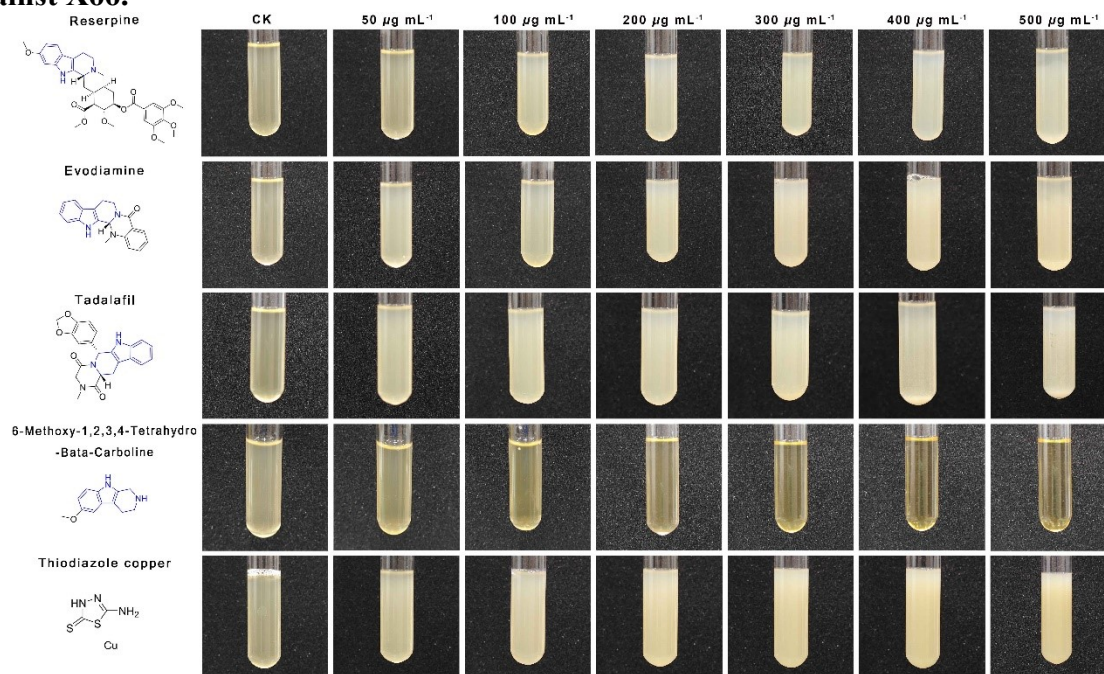

Supplement: d5ra07526b2.pdf [file d5ra07526b2.pdf]
